# Supplementary material
Source: PubMed Central journal article supplement (PMC4649178)
Supplement: AAC.01853-15_zac001164672so1.pdf [file AAC.01853-15_zac001164672so1.pdf]

**Supplemental Table 1.** Susceptibility results for each *A. baumannii* isolate (n=32) included in the study evaluating G3KL against standard antibiotics

| Strain                 | Country, year | Profile <sup>a</sup> | Carbapenemase detected | MICs [µg/ml] |             |            |            |           |            |            |            |            |            |            |            |           |            |            |                                    | MBCs [µg/ml]                         |                                    |                                      |
|------------------------|---------------|----------------------|------------------------|--------------|-------------|------------|------------|-----------|------------|------------|------------|------------|------------|------------|------------|-----------|------------|------------|------------------------------------|--------------------------------------|------------------------------------|--------------------------------------|
|                        |               |                      |                        | PTC<br>S≤16  | TIM<br>S≤16 | CAZ<br>S≤8 | FEP<br>S≤8 | ATM<br>NA | IMP<br>S≤2 | MEM<br>S≤2 | DOR<br>S≤2 | AK<br>S≤16 | GEN<br>S≤4 | CIP<br>S≤1 | SXT<br>S≤2 | TIG<br>NA | COL<br>S≤2 | POL<br>S≤2 | G3KL <sup>b,c</sup><br>Polystyrene | G3KL <sup>b,c</sup><br>Polypropylene | G3KL <sup>b,c</sup><br>Polystyrene | G3KL <sup>b,c</sup><br>Polypropylene |
| 2203591                | CH, 2013      | -                    | None                   | ≤8           | ≤16         | 1          | ≤2         | 16        | ≤1         | ≤1         | 0.25       | ≤4         | ≤1         | ≤0.25      | ≤0.5       | ≤0.25     | ≤0.25      | ≤0.25      | 4                                  | 4                                    | 8                                  | 8                                    |
| 2303905                | CH, 2014      | -                    | None                   | ≤8           | ≤16         | 2          | ≤2         | 16        | ≤1         | ≤1         | 0.25       | ≤4         | 2          | ≤0.25      | ≤0.5       | ≤0.25     | ≤0.25      | ≤0.25      | 4                                  | 4                                    | 4                                  | 4                                    |
| 2310924                | CH, 2014      | MDR                  | None                   | 64           | 128         | ≥32        | 16         | ≥32       | ≤1         | 2          | 1          | ≤4         | ≥16        | ≥4         | ≥8         | 0.5       | 1          | 2          | 8                                  | 8                                    | 8                                  | 8                                    |
| C07-031                | ITA, 2008     | MDR                  | OXA-58                 | ≥128         | 64          | ≥32        | 8          | ≥32       | ≤1         | ≤1         | 2          | ≥64        | ≥16        | 2          | ≥8         | 1         | 1          | 0.5        | 8                                  | 8                                    | 8                                  | 8                                    |
| C12-187                | ITA, 2008     | MDR                  | OXA-58                 | ≥128         | ≥256        | ≥32        | 16         | ≥32       | ≥16        | 8          | ≥4         | ≥64        | ≥16        | ≥4         | ≥8         | 1         | 0.5        | 0.5        | 4                                  | 8                                    | 4                                  | 8                                    |
| C14-1315               | ITA, 2008     | MDR                  | OXA-58                 | 64           | ≥256        | ≥32        | 8          | ≥32       | 8          | 4          | ≥4         | ≥64        | ≥16        | ≥4         | 4          | ≤0.25     | 0.5        | 1          | 8                                  | 8                                    | 8                                  | 8                                    |
| C15-035                | ITA, 2008     | MDR                  | OXA-58                 | 16           | ≥256        | ≥32        | 16         | ≥32       | ≤1         | 4          | 2          | ≥64        | ≥16        | ≥4         | ≥8         | 2         | 1          | 0.5        | 8                                  | 4                                    | 8                                  | 4                                    |
| 2266064                | CH, 2014      | XDR                  | None                   | ≥128         | ≥256        | ≥32        | ≥32        | ≥32       | ≥16        | ≥16        | ≥4         | ≥64        | ≥16        | ≥4         | ≥8         | 0.5       | 4          | 0.5        | 8                                  | 8                                    | 8                                  | 8                                    |
| 2327362                | CH, 2014      | XDR                  | OXA-23                 | ≥128         | ≥256        | ≥32        | ≥32        | ≥32       | ≥16        | ≥16        | ≥4         | ≥64        | ≥16        | ≥4         | ≥8         | 0.5       | 0.5        | ≤0.25      | 4                                  | 4                                    | 4                                  | 4                                    |
| 2318355                | CH, 2014      | XDR                  | OXA-23                 | ≥128         | ≥256        | ≥32        | ≥32        | ≥32       | ≥16        | ≥16        | ≥4         | ≥64        | ≥16        | ≥4         | ≥8         | 0.5       | 0.5        | ≤0.25      | 16                                 | 8                                    | 16                                 | 8                                    |
| 2319515                | CH, 2014      | XDR                  | OXA-23                 | ≥128         | ≥256        | ≥32        | ≥32        | ≥32       | ≥16        | ≥16        | ≥4         | ≥64        | ≥16        | ≥4         | ≥8         | 0.5       | 0.5        | ≤0.25      | 8                                  | 8                                    | 8                                  | 8                                    |
| 2317747                | CH, 2014      | XDR                  | OXA-24                 | ≥128         | ≥256        | ≥32        | ≥32        | ≥32       | ≥16        | ≥16        | ≥4         | ≥64        | ≥16        | ≥4         | ≥8         | 0.5       | 1          | 2          | 8                                  | 4                                    | 8                                  | 4                                    |
| 2343324                | CH, 2014      | XDR                  | OXA-24                 | ≥128         | ≥256        | ≥32        | 16         | ≥32       | ≥16        | ≥16        | ≥4         | ≥64        | ≥16        | ≥4         | ≥8         | 0.5       | 0.5        | 0.5        | 8                                  | 8                                    | 8                                  | 8                                    |
| 2316948-2              | CH, 2014      | XDR                  | OXA-24                 | ≥128         | ≥256        | ≥32        | ≥32        | ≥32       | ≥16        | ≥16        | ≥4         | ≥64        | ≥16        | ≥4         | ≥8         | 1         | 1          | 0.5        | 8                                  | 8                                    | 8                                  | 8                                    |
| 2316948-1              | CH, 2014      | XDR                  | OXA-24                 | ≥128         | ≥256        | ≥32        | ≥32        | ≥32       | ≥16        | ≥16        | ≥4         | ≥64        | ≥16        | ≥4         | ≥8         | 1         | 0.5        | ≤0.25      | 8                                  | 8                                    | 8                                  | 8                                    |
| 2332122                | CH, 2014      | XDR                  | OXA-23                 | ≥128         | ≥256        | ≥32        | ≥32        | ≥32       | ≥16        | ≥16        | ≥4         | ≥64        | ≥16        | ≥4         | ≥8         | 1         | 0.5        | 0.5        | 8                                  | 8                                    | 8                                  | 8                                    |
| 2321336                | CH, 2014      | XDR                  | OXA-24                 | ≥128         | ≥256        | ≥32        | ≥32        | ≥32       | ≥16        | ≥16        | 2          | ≥64        | ≥16        | ≥4         | ≥8         | 4         | 1          | 4          | 4                                  | 4                                    | 4                                  | 4                                    |
| VA-645/00 <sup>d</sup> | ITA, 2000     | XDR                  | OXA-24                 | ≥128         | ≥256        | ≥32        | 16         | ≥32       | ≥16        | ≥16        | ≥4         | ≥64        | ≥16        | ≥4         | ≥8         | 0.5       | 0.5        | ≤0.25      | 8                                  | 8                                    | 8                                  | 8                                    |
| C06-397                | ITA, 2008     | XDR                  | OXA-23                 | ≥128         | ≥256        | ≥32        | ≥32        | ≥32       | ≥16        | ≥16        | ≥4         | 16         | ≥16        | ≥4         | ≥8         | 4         | 0.5        | ≤0.25      | 8                                  | 8                                    | 8                                  | 8                                    |
| C13-279                | ITA, 2008     | XDR                  | OXA-23                 | ≥128         | ≥256        | ≥32        | ≥32        | ≥32       | ≥16        | ≥16        | ≥4         | ≥64        | ≥16        | ≥4         | ≥8         | 1         | 0.5        | 0.5        | 4                                  | 8                                    | 4                                  | 8                                    |
| C13-373                | ITA, 2008     | XDR                  | OXA-23                 | ≥128         | ≥256        | ≥32        | ≥32        | ≥32       | ≥16        | ≥16        | ≥4         | ≥64        | ≥16        | ≥4         | ≥8         | 1         | 0.5        | ≥8         | 8                                  | 8                                    | 8                                  | 8                                    |
| C07-007                | ITA, 2008     | XDR                  | OXA-58                 | ≥128         | ≥256        | ≥32        | 16         | ≥32       | ≥16        | ≥16        | ≥4         | ≥64        | ≥16        | 2          | ≥8         | 2         | 1          | 0.5        | 8                                  | 8                                    | 8                                  | 8                                    |
| C07-025                | ITA, 2008     | XDR                  | OXA-58                 | ≥128         | ≥256        | ≥32        | ≥32        | ≥32       | ≥16        | ≥16        | ≥4         | ≥64        | ≥16        | 2          | ≥8         | 1         | 1          | 1          | 8                                  | 8                                    | 8                                  | 8                                    |
| C15-207                | ITA, 2008     | XDR                  | OXA-58                 | ≥128         | ≥256        | ≥32        | 16         | ≥32       | ≥16        | ≥16        | ≥4         | ≥64        | ≥16        | ≥4         | ≥8         | 1         | 1          | 0.5        | 4                                  | 4                                    | 4                                  | 4                                    |
| C10-230                | ITA, 2008     | XDR                  | OXA-58                 | ≥128         | ≥256        | ≥32        | 8          | ≥32       | ≥16        | 8          | ≥4         | ≥64        | ≥16        | ≥4         | ≥8         | 1         | 1          | 0.5        | 8                                  | 8                                    | 8                                  | 8                                    |
| C14-275                | ITA, 2008     | XDR                  | OXA-58                 | ≥128         | ≥256        | ≥32        | 8          | ≥32       | ≥16        | 8          | ≥4         | 16         | ≥16        | ≥4         | ≥8         | 1         | 1          | 1          | 8                                  | 8                                    | 8                                  | 8                                    |
| C14-336                | ITA, 2008     | XDR                  | OXA-58                 | ≥128         | ≥256        | ≥32        | 8          | ≥32       | 8          | 8          | ≥4         | ≥64        | ≥16        | ≥4         | 4          | 0.5       | ≤0.25      | 0.5        | 8                                  | 8                                    | 8                                  | 8                                    |
| C14-1275               | ITA, 2008     | XDR                  | OXA-58                 | ≥128         | ≥256        | ≥32        | 8          | ≥32       | ≥16        | 8          | ≥4         | ≥64        | ≥16        | ≥4         | ≥8         | 1         | 1          | 1          | 8                                  | 4                                    | 8                                  | 4                                    |
| 02C03                  | ITA, 2011     | XDR                  | OXA-23                 | ≥128         | ≥256        | ≥32        | 16         | ≥32       | ≥16        | ≥16        | ≥4         | ≥64        | ≥16        | ≥4         | ≥8         | 0.5       | 0.5        | 0.5        | 8                                  | 8                                    | 8                                  | 8                                    |
| 03C03                  | ITA, 2011     | XDR                  | OXA-23                 | ≥128         | ≥256        | ≥32        | ≥32        | ≥32       | ≥16        | ≥16        | ≥4         | ≥64        | ≥16        | ≥4         | ≥8         | 1         | ≤0.25      | 0.5        | 8                                  | 8                                    | 8                                  | 8                                    |
| 03C10                  | ITA, 2011     | XDR                  | OXA-23                 | ≥128         | ≥256        | ≥32        | ≥32        | ≥32       | ≥16        | ≥16        | ≥4         | 16         | ≥16        | ≥4         | 1          | 4         | ≤0.25      | ≤0.25      | 8                                  | 8                                    | 8                                  | 8                                    |
| 2172421                | CH, 2013      | PDR                  | OXA-24                 | ≥128         | ≥256        | ≥32        | ≥32        | ≥32       | ≥16        | ≥16        | ≥4         | ≥64        | ≥16        | ≥4         | ≥8         | 2         | ≥8         | ≥8         | 8                                  | 4                                    | 8                                  | 4                                    |

**Note.** ID, species identification; MIC, minimum inhibitory concentration; MBC, minimum bactericidal concentration; PDR, pandrug-resistant; XDR, extensively-drug resistant; MDR, multidrug-resistant; -, non-MDR; S, susceptible (according to CLSI 2014); CH, Switzerland; ITA, Italy; NA, not available; PTC, piperacillin/tazobactam; TIM, ticarcillin/clavulanate; CAZ, ceftazidime; FEP, cefepime; ATM, aztreonam; IMP, imipenem; MEM, meropenem; DOR, doripenem; AK, amikacin; GEN, gentamicin; CIP, ciprofloxacin; TIG, tigecycline; COL, colistin; POL, polymyxin B.

<sup>a</sup> According to the criteria of Magiorakos *et al.* *Clin Microbiol Infect* 18:268-281, 2012

<sup>b</sup> Phenotypic test for G3KL were performed using polypropylene (standard) and polystyrene 96-well plates

<sup>c</sup> Overall, 31 out of 32 strains tested with both polypropylene or polystyrene plates had the same MIC and MBC values

<sup>d</sup> Isolate VA-645/00 was previously studied and published with the name VA-566/00 (D'Andrea *et al.*, 2009, *Antimicrob Agents Chemother* 53:3528-3533)

**Supplemental Table 2.** Susceptibility results for each *P. aeruginosa* (n=35) included in the study evaluating G3KL against standard antibiotics

| Strain      | Country, year | Profile <sup>a</sup> | Carbapenemase detected | MICs [µg/ml] |             |            |            |            |            |            |            |            |            |            |           |           |            |            |                                    |                                      | MBCs [µg/ml]                       |                                      |
|-------------|---------------|----------------------|------------------------|--------------|-------------|------------|------------|------------|------------|------------|------------|------------|------------|------------|-----------|-----------|------------|------------|------------------------------------|--------------------------------------|------------------------------------|--------------------------------------|
|             |               |                      |                        | PTC<br>S≤16  | TIM<br>S≤16 | CAZ<br>S≤8 | FEP<br>S≤8 | ATM<br>S≤8 | IMP<br>S≤2 | MEM<br>S≤2 | DOR<br>S≤2 | AK<br>S≤16 | GEN<br>S≤4 | CIP<br>S≤1 | SXT<br>NA | TIG<br>NA | COL<br>S≤2 | POL<br>S≤2 | G3KL <sup>b,c</sup><br>Polystyrene | G3KL <sup>b,c</sup><br>Polypropylene | G3KL <sup>b,c</sup><br>Polystyrene | G3KL <sup>b,c</sup><br>Polypropylene |
| 2226680     | CH, 2013      | -                    | None                   | ≤8           | ≤16         | ≤1         | ≤2         | ≤2         | ≤1         | ≤1         | ≤0.125     | 16         | ≥16        | 0.5        | ≤0.5      | 2         | ≥8         | ≥8         | 8                                  | 4                                    | 16                                 | 4                                    |
| 2184627     | CH, 2013      | -                    | None                   | ≤8           | 32          | 16         | 4          | 8          | ≤1         | ≤1         | 0.25       | ≤4         | ≤1         | ≤0.25      | 4         | 4         | 1          | 1          | 8                                  | 8                                    | 8                                  | 8                                    |
| 2296294     | CH, 2014      | -                    | None                   | ≤8           | ≤16         | ≤1         | ≤2         | 8          | ≤1         | ≤1         | 0.25       | ≤4         | ≤1         | ≤0.25      | ≥8        | 8         | 2          | 1          | 4                                  | 8                                    | 8                                  | 8                                    |
| 2291604     | CH, 2014      | -                    | None                   | 16           | ≤16         | 4          | 4          | ≥32        | ≤1         | ≤1         | ≤0.125     | ≥64        | 2          | 1          | 4         | 4         | 2          | 1          | 16                                 | 16                                   | 32                                 | 16                                   |
| 2306440     | CH, 2014      | -                    | None                   | ≤8           | 32          | 2          | ≤2         | 16         | ≤1         | ≤1         | ≤0.125     | ≤4         | 2          | ≤0.25      | 4         | 8         | 1          | 2          | 8                                  | 8                                    | 8                                  | 8                                    |
| 2307544     | CH, 2014      | -                    | None                   | ≤8           | 32          | ≤1         | ≤2         | 8          | ≤1         | ≤1         | ≤0.125     | ≤4         | ≤1         | ≤0.25      | ≥8        | 4         | 1          | 1          | 4                                  | 8                                    | 4                                  | 8                                    |
| 2223278     | CH, 2013      | MDR                  | None                   | ≤8           | 64          | 16         | ≥32        | ≥32        | 2          | 2          | 1          | ≤4         | ≤1         | 2          | ≥8        | 8         | 4          | 1          | 8                                  | 8                                    | 16                                 | 8                                    |
| 2186565     | CH, 2013      | MDR                  | None                   | ≤8           | 32          | 2          | ≤2         | ≥32        | ≤1         | ≤1         | 0.25       | ≥64        | ≤1         | ≤0.25      | ≥8        | 8         | ≥8         | ≥8         | 4                                  | 8                                    | 8                                  | 8                                    |
| 2267476     | CH, 2014      | MDR                  | None                   | ≥128         | ≥256        | ≥32        | 8          | ≥32        | ≥16        | ≥16        | ≥4         | ≥64        | ≤1         | 1          | ≥8        | ≥16       | 1          | 1          | 4                                  | 4                                    | 8                                  | 4                                    |
| 2280037-II  | CH, 2014      | MDR                  | None                   | ≥128         | ≥256        | ≥32        | ≥32        | ≥32        | ≥16        | ≥16        | ≥4         | ≤4         | ≤1         | ≤0.25      | ≥8        | 2         | 0.5        | 1          | 4                                  | 4                                    | 4                                  | 4                                    |
| 2280037-III | CH, 2014      | MDR                  | None                   | ≥128         | ≥256        | 8          | 16         | ≥32        | ≥16        | ≥16        | ≥4         | 8          | 4          | 0.5        | ≥8        | 8         | 1          | 1          | 4                                  | 4                                    | 8                                  | 8                                    |
| VA-182/00   | ITA, 2000     | MDR                  | VIM-2                  | 32           | ≥256        | 16         | 8          | 8          | ≥16        | ≥16        | ≥4         | 8          | ≥16        | ≥4         | ≥8        | ≥16       | 2          | 1          | 4                                  | 8                                    | 16                                 | 8                                    |
| C02-387     | ITA, 2008     | MDR                  | VIM-type               | ≥128         | ≥256        | ≥32        | ≥32        | 8          | ≥16        | ≥16        | ≥4         | 16         | ≥16        | ≥4         | ≥8        | 8         | 1          | 1          | 8                                  | 8                                    | 8                                  | 8                                    |
| C20-111     | ITA, 2008     | MDR                  | IMP-type               | 16           | ≥256        | ≥32        | ≥32        | ≥32        | 2          | 2          | 1          | ≤4         | ≥16        | ≥4         | ≥8        | ≥16       | 1          | 1          | 8                                  | 4                                    | 8                                  | 4                                    |
| 2280037-I   | CH, 2014      | XDR                  | None                   | ≥128         | ≥256        | ≥32        | ≥32        | ≥32        | ≥16        | ≥16        | ≥4         | ≥64        | 4          | 0.5        | 4         | ≥16       | ≥8         | ≥8         | 8                                  | 8                                    | 8                                  | 8                                    |
| 2256279     | CH, 2014      | XDR                  | None                   | ≥128         | ≥256        | ≥32        | ≥32        | ≥32        | ≥16        | ≥16        | ≥4         | ≥64        | ≥16        | ≥4         | 2         | 4         | 0.5        | 1          | 4                                  | 8                                    | 4                                  | 8                                    |
| VA-506/99   | ITA, 1999     | XDR                  | IMP-2                  | ≥128         | 128         | ≥32        | ≥32        | ≥32        | ≥16        | ≥16        | ≥4         | ≥64        | ≥16        | ≥4         | ≥8        | 8         | 2          | 1          | 4                                  | 8                                    | 8                                  | 8                                    |
| C08-053     | ITA, 2008     | XDR                  | IMP-type               | ≥128         | ≥256        | ≥32        | ≥32        | ≥32        | ≥16        | ≥16        | ≥4         | 8          | ≥16        | ≥4         | ≥8        | ≥16       | 2          | 1          | 8                                  | 8                                    | 8                                  | 8                                    |
| C02-072     | ITA, 2008     | XDR                  | VIM-type               | 64           | ≥256        | ≥32        | 16         | 16         | ≥16        | ≥16        | ≥4         | 32         | 4          | ≥4         | ≥8        | 8         | 2          | 1          | 8                                  | 8                                    | 8                                  | 8                                    |
| C02-290     | ITA, 2008     | XDR                  | VIM-type               | 32           | ≥256        | ≥32        | 16         | ≥32        | ≥16        | ≥16        | ≥4         | ≥64        | 2          | ≥4         | ≥8        | 8         | 2          | 4          | 8                                  | 32                                   | 8                                  | 32                                   |
| C02-322     | ITA, 2008     | XDR                  | VIM-type               | 32           | ≥256        | 16         | 16         | ≥32        | ≥16        | ≥16        | ≥4         | ≥64        | ≥16        | ≥4         | ≥8        | ≥16       | 2          | 1          | 8                                  | 8                                    | 8                                  | 8                                    |
| C03-150     | ITA, 2008     | XDR                  | VIM-type               | ≥128         | ≥256        | ≥32        | ≥32        | 16         | ≥16        | ≥16        | ≥4         | 8          | ≥16        | ≥4         | ≥8        | 8         | 2          | 1          | 8                                  | 8                                    | 8                                  | 8                                    |
| C05-230     | ITA, 2008     | XDR                  | VIM-type               | ≥128         | ≥256        | ≥32        | ≥32        | ≥32        | ≥16        | ≥16        | ≥4         | 8          | ≥16        | ≥4         | ≥8        | 8         | 2          | 1          | 8                                  | 8                                    | 8                                  | 8                                    |
| C06-242     | ITA, 2008     | XDR                  | VIM-type               | 32           | ≥256        | ≥32        | 16         | ≥32        | ≥16        | 8          | ≥4         | 32         | ≥16        | ≥4         | ≥8        | ≥16       | ≥8         | 1          | 4                                  | 8                                    | 8                                  | 8                                    |
| C06-319     | ITA, 2008     | XDR                  | VIM-type               | 32           | ≥256        | 16         | 16         | ≥32        | ≥16        | 8          | ≥4         | ≥64        | 4          | ≥4         | ≥8        | 8         | 2          | 1          | 4                                  | 8                                    | 4                                  | 8                                    |
| C07-211     | ITA, 2008     | XDR                  | VIM-type               | ≥128         | ≥256        | ≥32        | ≥32        | ≥32        | ≥16        | ≥16        | ≥4         | 8          | ≥16        | ≥4         | ≥8        | 8         | 2          | 1          | 4                                  | 8                                    | 8                                  | 8                                    |
| C08-035     | ITA, 2008     | XDR                  | VIM-type               | ≥128         | ≥256        | ≥32        | ≥32        | ≥32        | ≥16        | ≥16        | ≥4         | 8          | ≥16        | ≥4         | ≥8        | 8         | 2          | 1          | 4                                  | 8                                    | 8                                  | 8                                    |
| C09-217     | ITA, 2008     | XDR                  | VIM-type               | ≥128         | ≥256        | ≥32        | ≥32        | ≥32        | 8          | 8          | ≥4         | ≤4         | ≥16        | ≥4         | ≥8        | 8         | 1          | 1          | 8                                  | 8                                    | 8                                  | 8                                    |
| C13-395     | ITA, 2008     | XDR                  | VIM-type               | ≥128         | ≥256        | ≥32        | 16         | ≥32        | ≥16        | ≥16        | ≥4         | ≥64        | 4          | ≥4         | ≥8        | ≥16       | 1          | 1          | 4                                  | 8                                    | 8                                  | 8                                    |
| C14-157     | ITA, 2008     | XDR                  | VIM-type               | ≥128         | ≥256        | ≥32        | ≥32        | ≥32        | ≥16        | ≥16        | ≥4         | ≥64        | ≥16        | ≥4         | ≥8        | ≥16       | 2          | 1          | 4                                  | 8                                    | 8                                  | 8                                    |
| C17-318     | ITA, 2008     | XDR                  | VIM-type               | ≥128         | ≥256        | ≥32        | ≥32        | ≥32        | ≥16        | ≥16        | ≥4         | ≥64        | ≥16        | ≥4         | ≥8        | ≥16       | 2          | 1          | 8                                  | 8                                    | 8                                  | 8                                    |
| C20-129     | ITA, 2008     | XDR                  | VIM-type               | ≥128         | ≥256        | ≥32        | ≥32        | ≥32        | ≥16        | ≥16        | ≥4         | ≥64        | ≥16        | ≥4         | ≥8        | ≥16       | 2          | 1          | 8                                  | 8                                    | 8                                  | 8                                    |
| Control     | USA, NA       | XDR                  | VIM-1                  | ≥128         | ≥256        | ≥32        | ≥32        | 16         | ≥16        | ≥16        | ≥4         | ≤4         | ≥16        | ≥4         | ≥8        | ≥16       | 2          | 1          | 4                                  | 4                                    | 4                                  | 4                                    |
| 2221712     | CH, 2013      | PDR                  | None                   | 64           | 128         | ≥32        | ≥32        | ≥32        | ≥16        | 8          | ≥4         | ≥64        | ≥16        | 2          | ≤0.5      | 2         | ≥8         | ≥8         | 64                                 | 2                                    | 128                                | 32                                   |
| C05-032     | ITA, 2008     | PDR                  | VIM-type               | ≥128         | ≥256        | ≥32        | ≥32        | 16         | ≥16        | ≥16        | ≥4         | 32         | ≥16        | ≥4         | ≥8        | 8         | ≥8         | ≥8         | 8                                  | 32                                   | 8                                  | 32                                   |

**Note.** ID, species identification; MIC, minimum inhibitory concentration; MBC, minimum bactericidal concentration; CH, Switzerland; ITA, Italy; PDR, pandrug-resistant; XDR, extensively-drug resistant; MDR, multidrug-resistant; -, non-MDR; S, susceptible (according to CLSI 2014); NA, not available; PTC, piperacillin/tazobactam; TIM, ticarcillin/clavulanate; CAZ, ceftazidime; FEP, cefepime; ATM, aztreonam; IMP, imipenem; MEM, meropenem; DOR, doripenem; AK, amikacin; GEN, gentamicin; CIP, ciprofloxacin; TIG, tigecycline; COL, colistin; POL, polymyxin B.

<sup>a</sup> According to the criteria of Magiorakos *et al.* *Clin Microbiol Infect* 18:268-281, 2012

<sup>b</sup> Phenotypic test for G3KL were performed using polypropylene (standard) and polystyrene 96-well plates

<sup>c</sup> Overall, 33 out of 35 strains tested with polypropylene and 20 out of 35 strains tested with polystyrene plates had the same MIC and MBC values
